# Supplementary material
Source: Royal Society of Chemistry journal article supplement (doi:10.1039/d6ob00334f)

## Supplementary Information

# Studies Directed toward the Synthesis of 4-Deoxy-10-oxodihydrobotrydial, a Naturally occurring Botryane

Kalpesh Ananda Khude and Tushar Kanti Chakraborty\*

Department of Organic Chemistry, Indian Institute of Science, Bengaluru 560012, India

*tushar@iisc.ac.in*

| <b>Contents</b>                                  | <b>Pages</b> |
|--------------------------------------------------|--------------|
| 1) Spectra of compounds 7, 11, 12, 13, 14 and 16 | 2-6          |
| 2) NOE studies of compounds 7 and 14             | 7-8          |

$^1\text{H}$  NMR (400 MHz,  $\text{CDCl}_3$ ) of 7

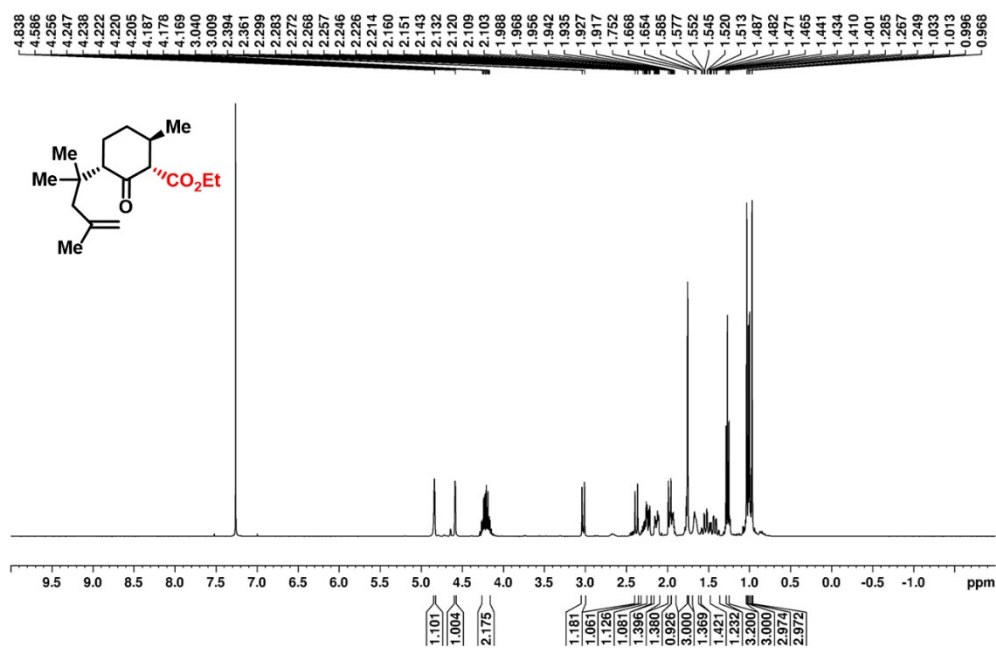

$^{13}\text{C}$  NMR (100 MHz,  $\text{CDCl}_3$ ) of 7

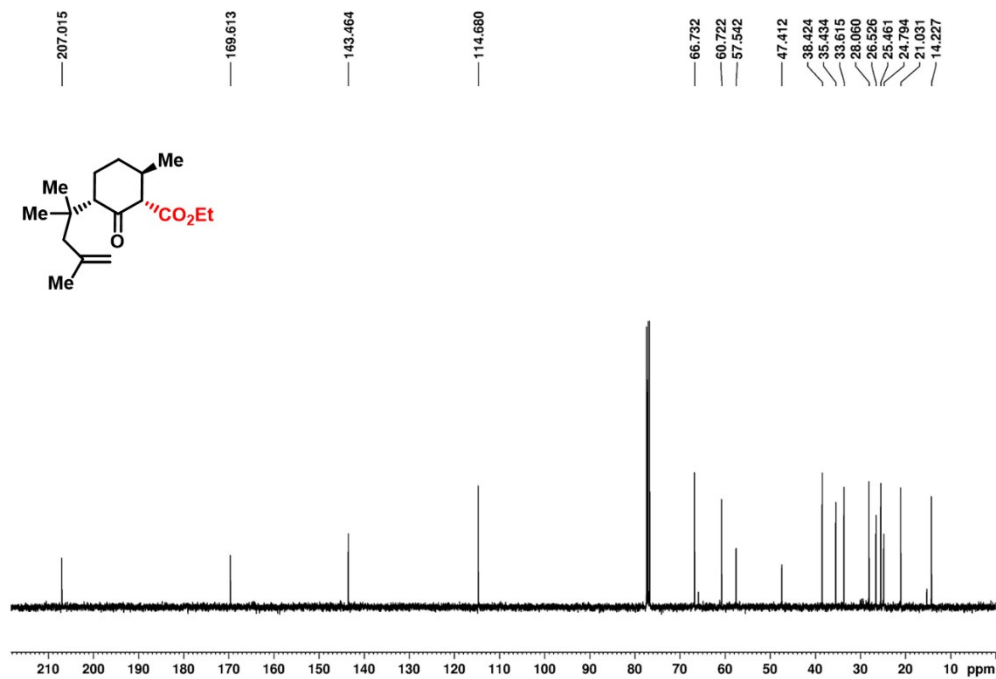

$^1\text{H}$  NMR (400 MHz,  $\text{CDCl}_3$ ) of **11**

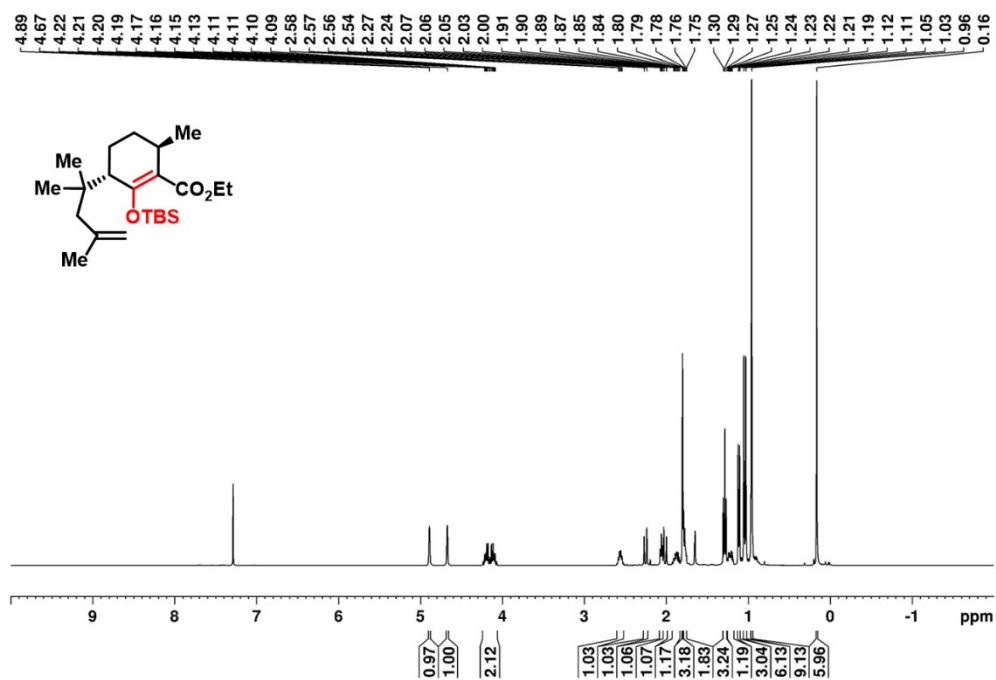

$^{13}\text{C}$  NMR (100 MHz,  $\text{CDCl}_3$ ) of **11**

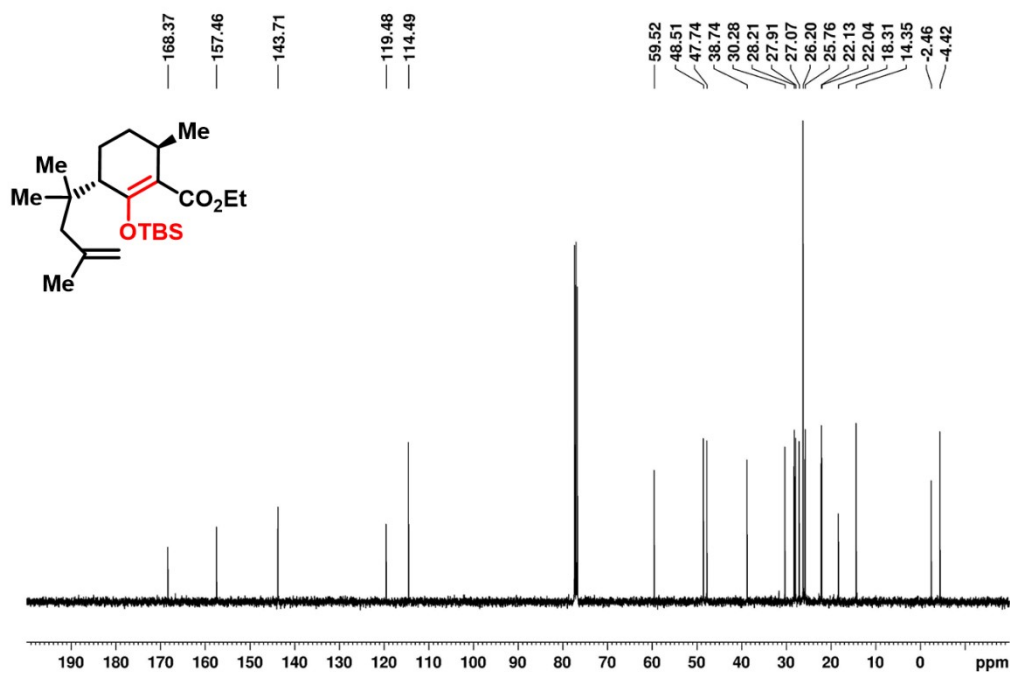

$^1\text{H}$  NMR (400 MHz,  $\text{CDCl}_3$ ) of **12**

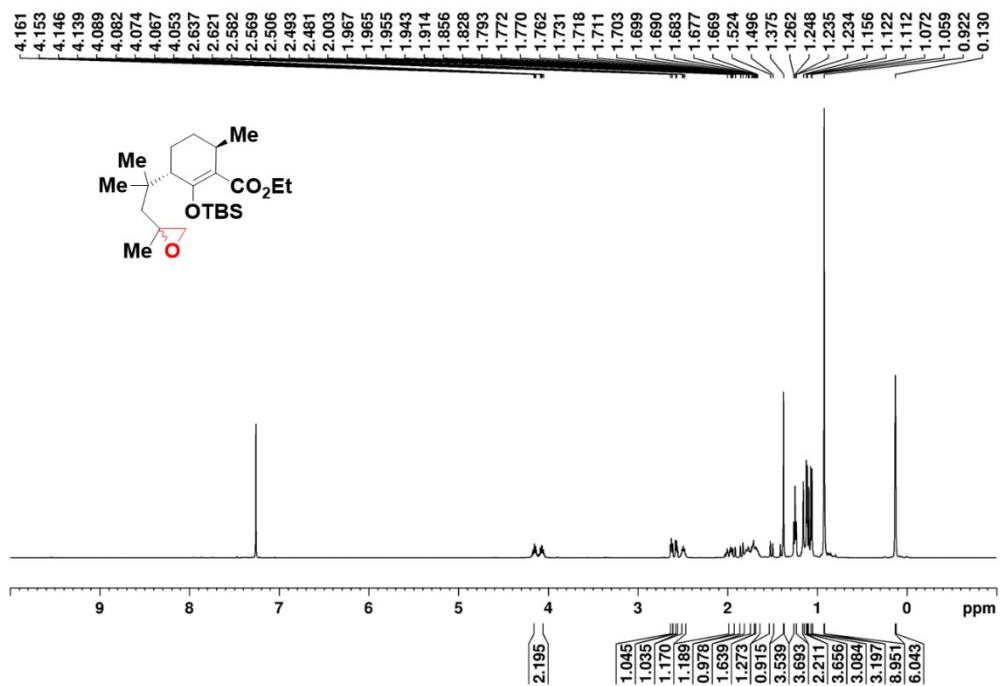

$^{13}\text{C}$  NMR (100 MHz,  $\text{CDCl}_3$ ) of **12**

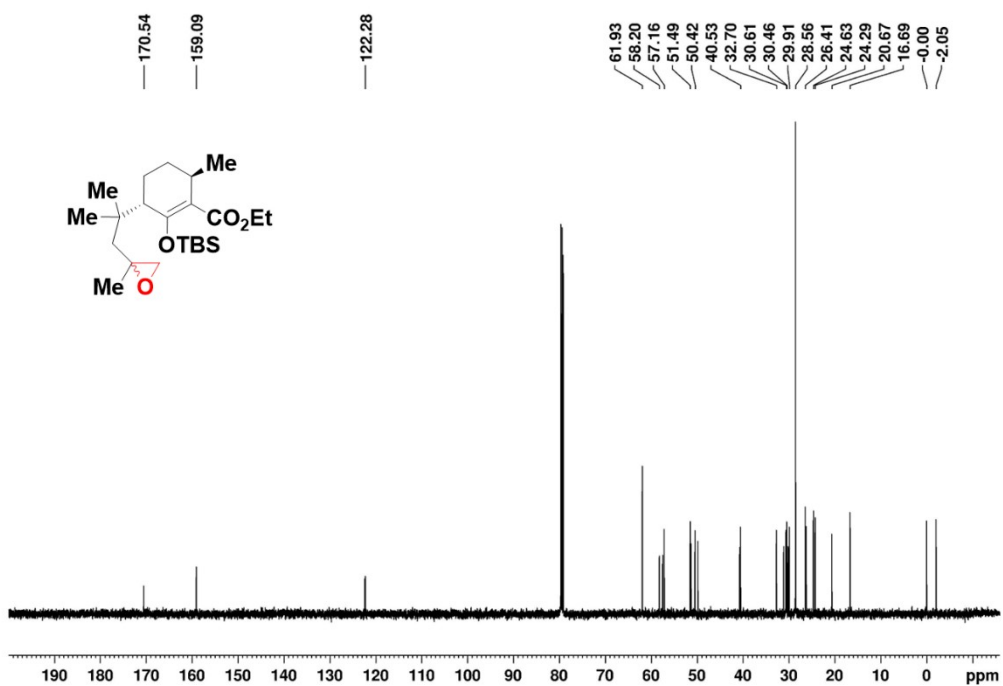

$^1\text{H}$  NMR (400 MHz,  $\text{CDCl}_3$ ) of **13**

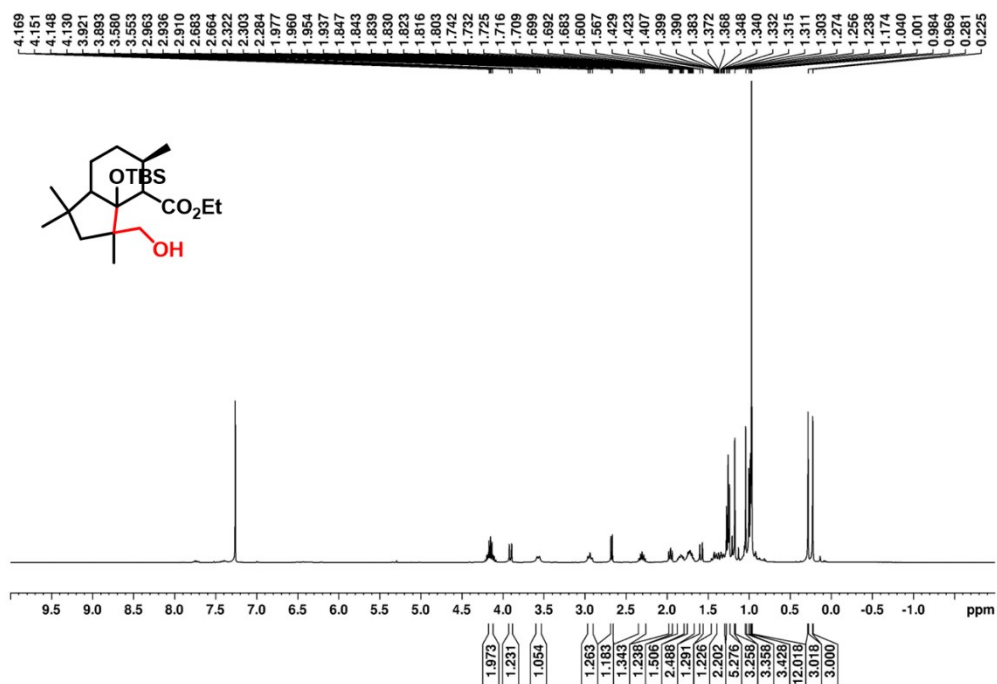

$^{13}\text{C}$  NMR (100 MHz,  $\text{CDCl}_3$ ) of **13**

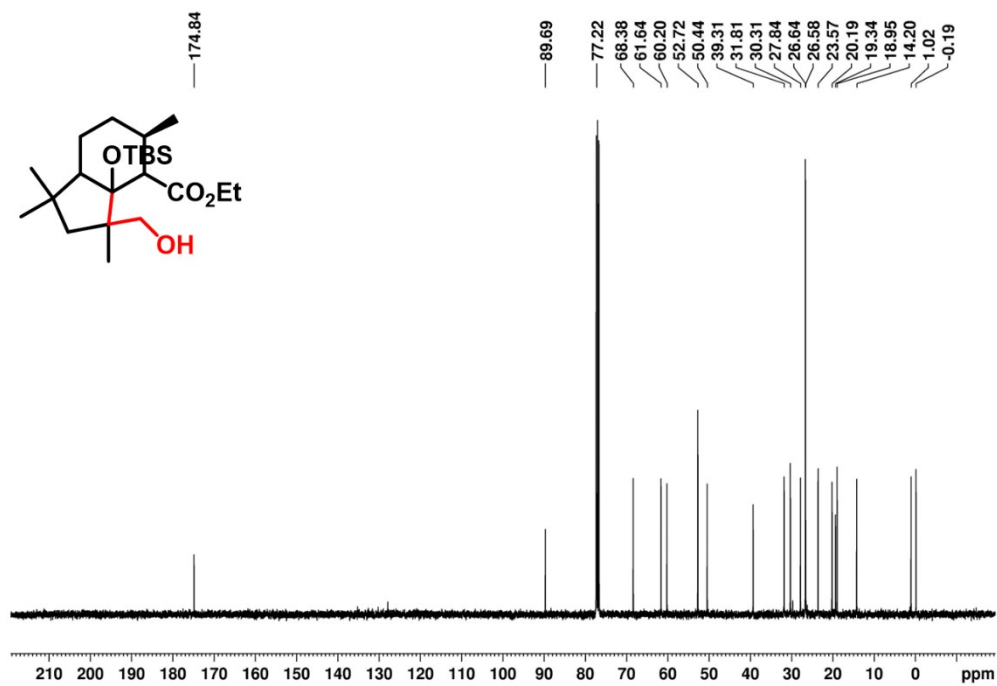

$^1\text{H}$  NMR (400 MHz,  $\text{CDCl}_3$ ) of **14**

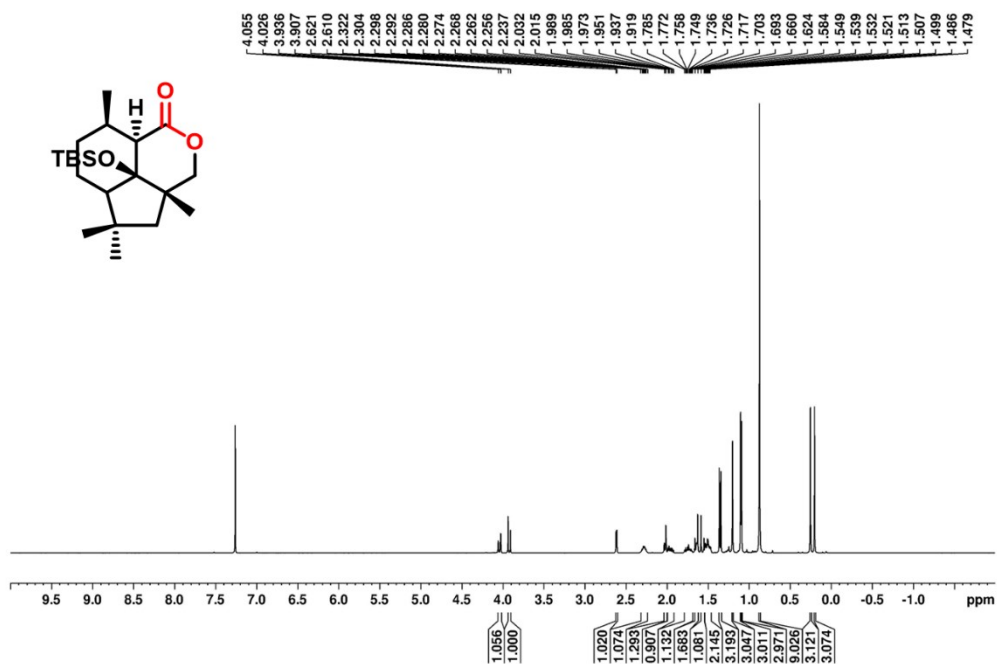

$^{13}\text{C}$  NMR (100 MHz,  $\text{CDCl}_3$ ) of **14**

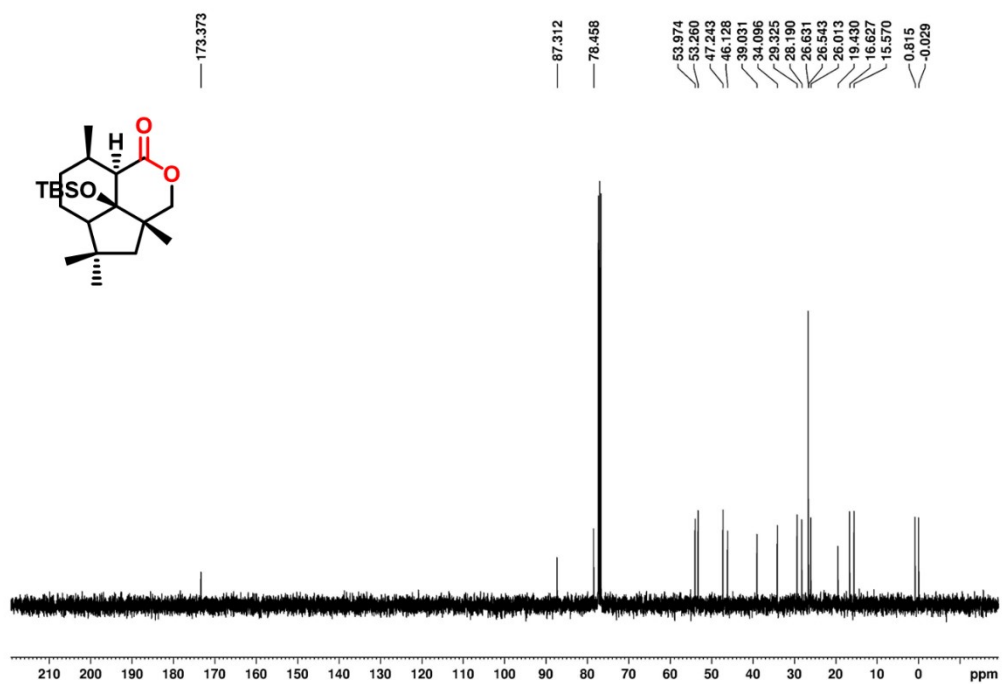

NOE data of 7

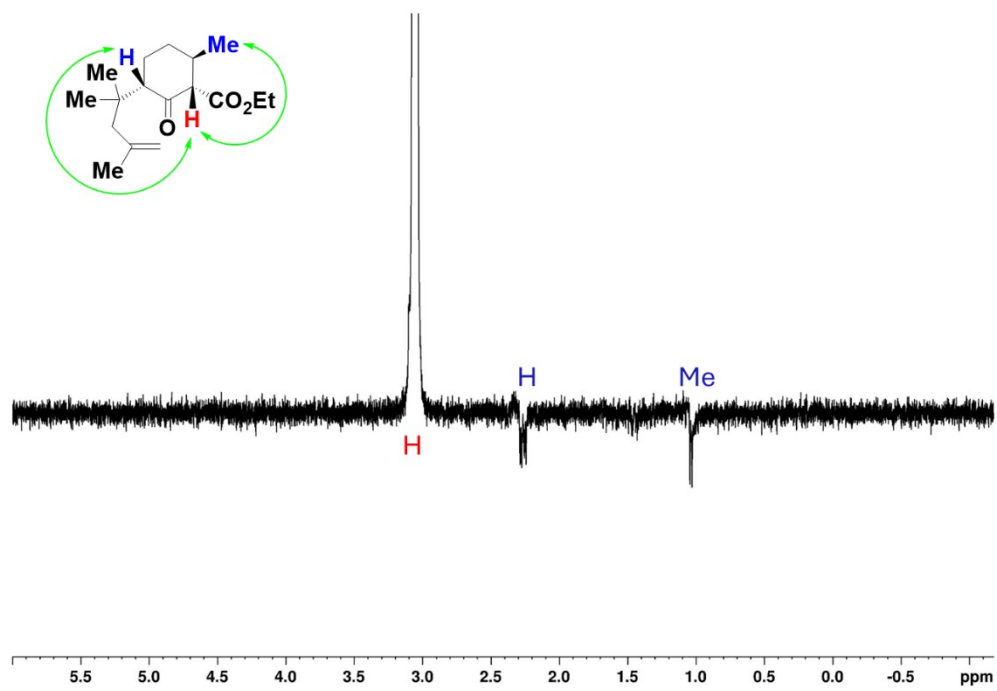

NOE data for 14

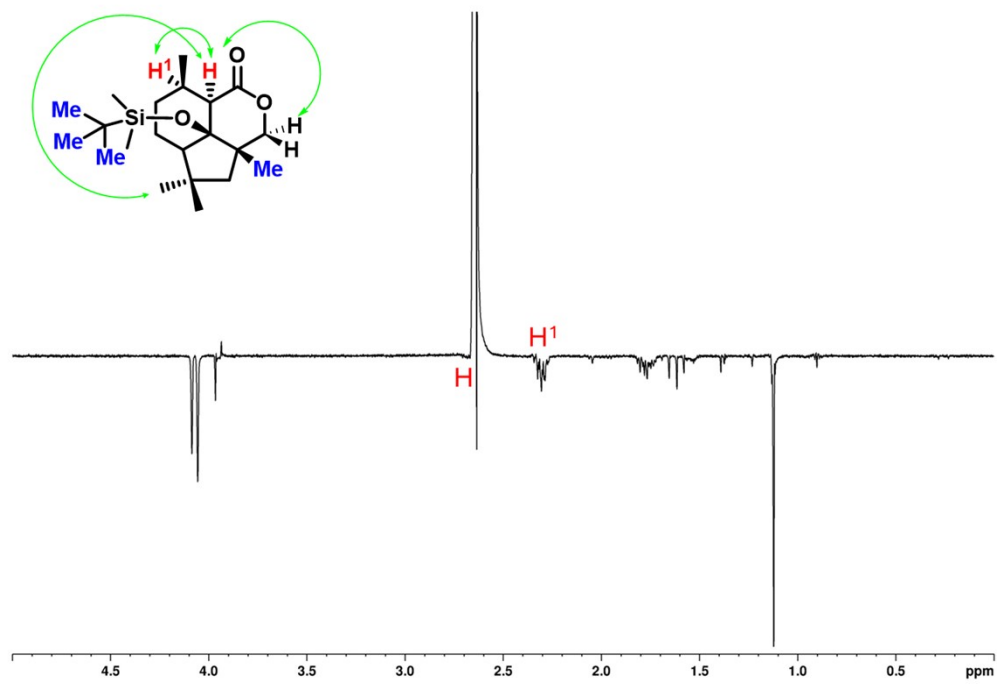

NOE data for 14

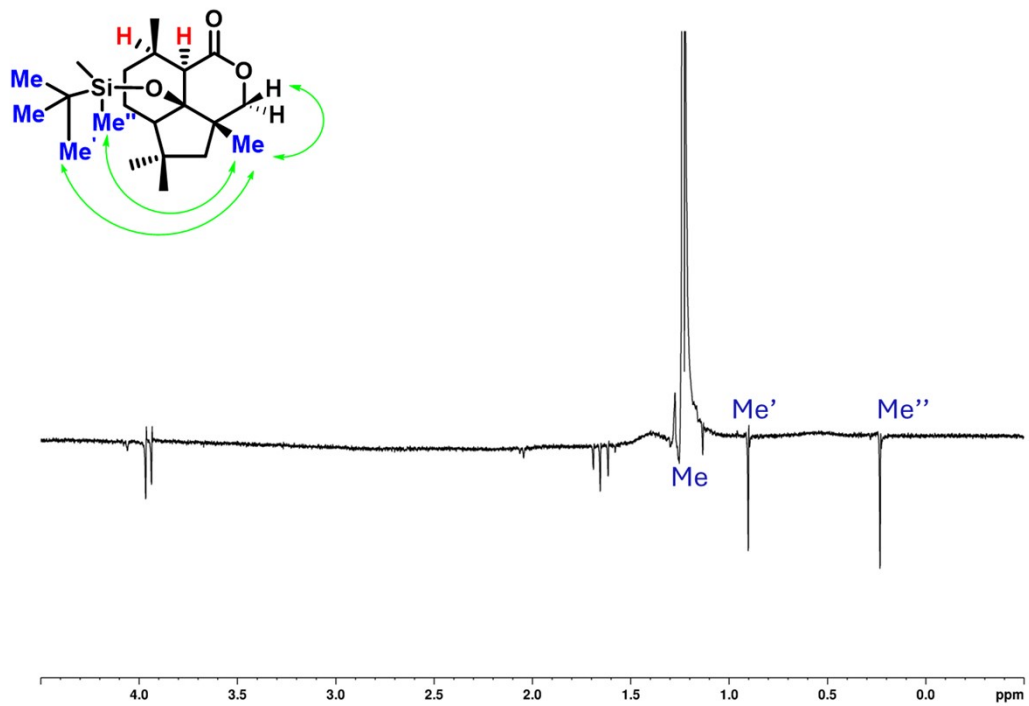

Supplement: d6ob00334f1.pdf [file d6ob00334f1.pdf]
